# Supplementary material for: Metal salt-derived In–Ga–Zn–O semiconductors incorporating formamide as a novel co-solvent for producing solution-processed, electrohydrodynamic-jet printed, high performance oxide transistors
Source: Royal Society of Chemistry journal article supplement (doi:10.1039/c3tc30530a), 2013-01-01
Supplement: c3tc30530a.pdf [file c3tc30530a.pdf]

## Electronic Supplementary Information for

### Metal Salt-Derived In-Ga-Zn-O Semiconductors Incorporating Formamide as Novel Co-solvent for Producing Solution-Processed, Electrohydrodynamic-Jet Printed, High Performance Oxide Transistors

Sunho Jeong,\* Ji-Yoon Lee, Sun Sook Lee, Yeong-Hui Seo, So-Yun Kim, Jang-Ung Park, Beyong-Hwan Ryu, Wooseok Yang, Jooho Moon,\* and Youngmin Choi\*

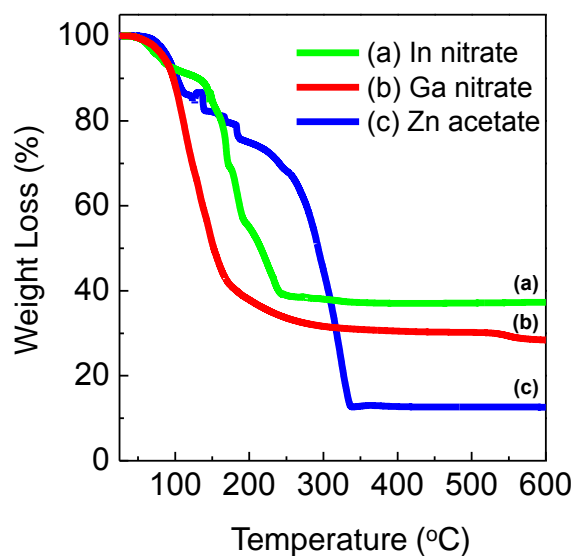

**Fig. S1.** TGA curves for precursors (In nitrate, Ga nitrate, and Zn acetate) used for synthesizing the IGZO solution.

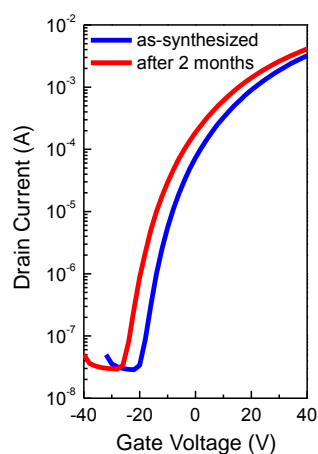

**Fig. S2.** The transfer characteristic for TFTs employing the IGZO channel layers prepared from as-synthesized and 2-months lasting precursor solution. Both precursor solutions included the FA of 50 vol%. The mobility and threshold voltage of IGZO TFT with channel layer prepared from 2-months lasting precursor solution were  $9.9 \text{ cm}^2/\text{V}\cdot\text{s}$  and  $-8.9 \text{ V}$ , respectively.

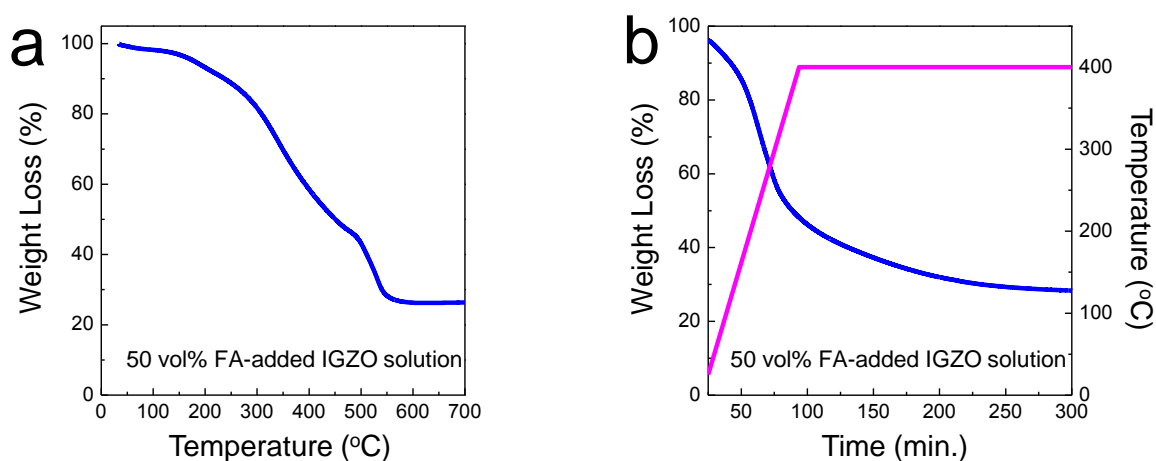

**Fig. S3.** (a) Temperature-dependent TGA curve and (b) time-dependent, isothermal TGA curve at  $400 \text{ }^\circ\text{C}$  for 50 vol% FA-added IGZO precursor solution. The heating rate was  $5 \text{ }^\circ\text{C}/\text{min}$ .

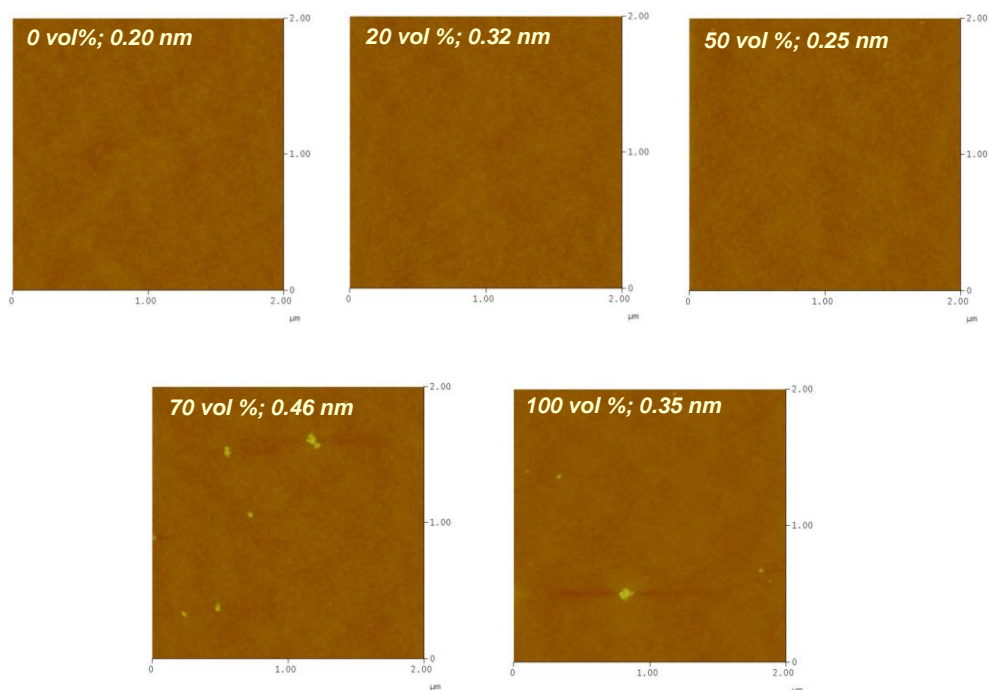

**Fig. S4.** Atomic force microscopy images for IGZO semiconductors derived from precursor solutions containing the different amount of FA between 0 and 100 vol%. The numbers indicate the value of r.m.s. roughness.

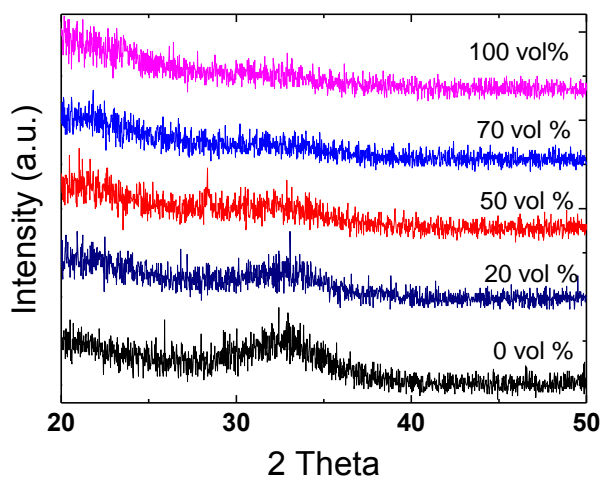

**Fig. S5.** X-ray diffraction results for IGZO semiconductors derived from precursor solutions containing the different amount of FA between 0 and 100 vol%.

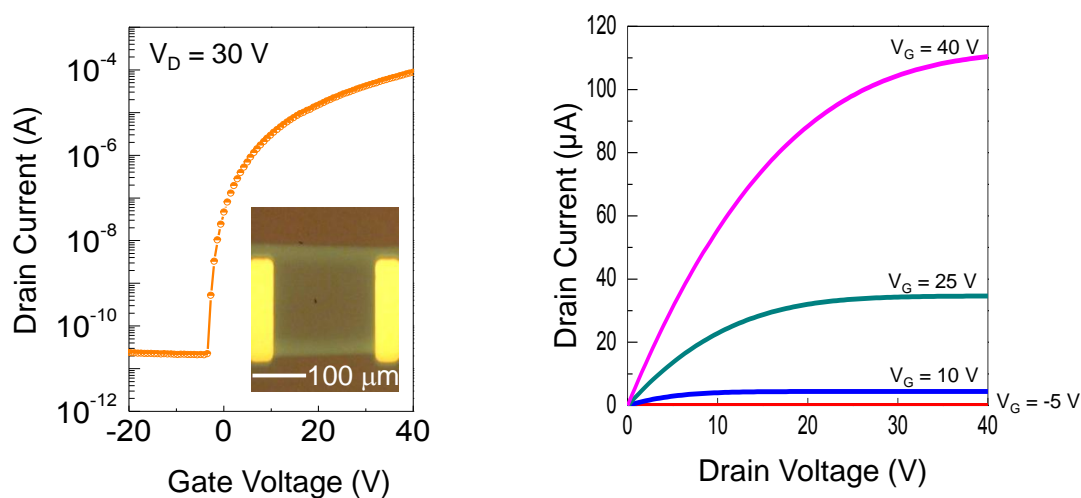

**Fig. S6.** Transfer and output characteristic for TFT employing e-jet printed IGZO channel layer, with a different channel geometry, that was formed by overlapping the lines. Inset is the optical microscopy image for a channel region. The 50 vol% FA-added IGZO precursor solution was used for e-jet printing.

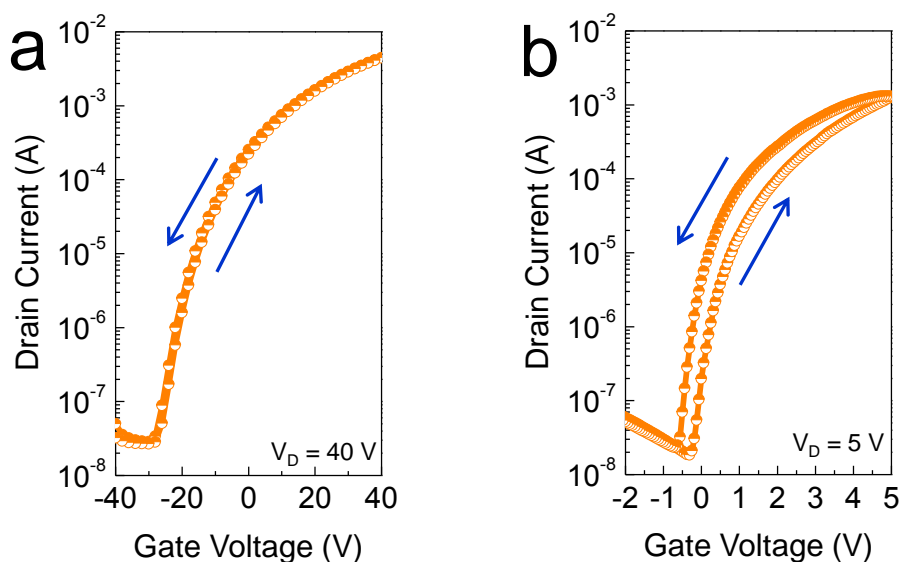

**Fig. S7.** The hysteresis behaviors for TFTs with (a) IGZO/SiO<sub>2</sub> and (b) IGZO/ZAO semiconductor/dielectric stack. The 50 vol% FA-added IGZO precursor solution was spin-coated as a channel layer.
